# Supplementary material for: Arbuscular Mycorrhizae Alter Photosynthetic Responses to Drought in Seedlings of Artemisia tridentata
Source: MDPI journal article supplement (doi:10.3390/plants12162990), 2023-08-19
Supplement: s1 [file s1]

Table S1. Percent colonization of *Artemisia tridentata* roots by septate fungi before and after the imposition of drought. Inoculated plants were grown in a potting mix supplemented with arbuscular mycorrhizal spores. Medians (and 95% confidence limits) of five plants. Plants sampled before the drought were different from those after the drought. The *p*-values are based on unpaired Wilcoxon tests.

| Colonization          | Non-inoculated | inoculated     | <i>p</i> -value |
|-----------------------|----------------|----------------|-----------------|
| Total before          | 6.8 (4.2, 9.3) | 5.0 (1.4, 8.7) | 0.262           |
| Microsclerotia before | 2.5 (0.6, 5.0) | 0 (0, 2.5)     | 0.065           |
| Total after           | 2.2 (0.8, 6.4) | 0.8 (0.5, 4.0) | 0.690           |
| Microsclerotia after  | 2.2 (0.8, 3.7) | 0 (0, 2.7)     | 0.095           |

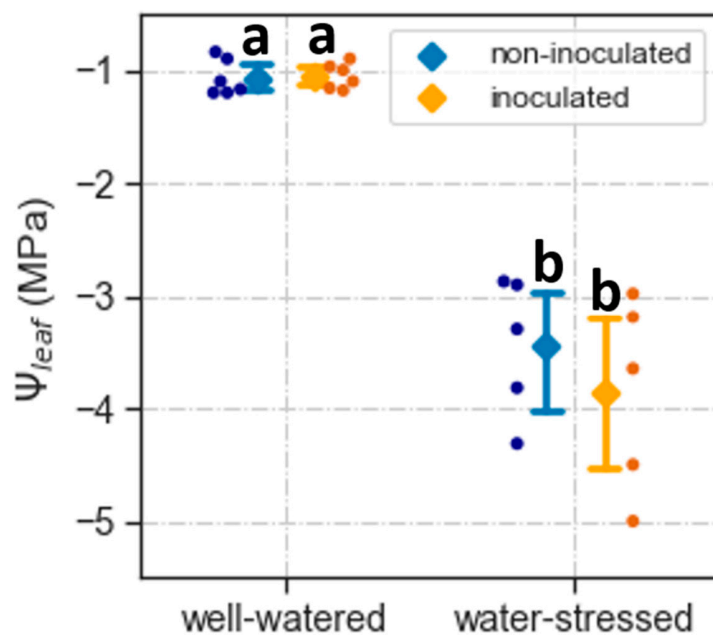

Figure S1. Water potential of well-watered and water-stressed *Artemisia tridentata* seedlings. Circles show the water potential of individual seedlings, while diamonds and error bars represent means and 95% confidence limits. Based on Welch's ANOVA test, different letters indicate

statistical differences ( $p < 0.05$ ). In water-stressed seedlings, plant water potential was determined after stomatal closure ( $g_s < 0.03 \text{ mol m}^{-2} \text{ s}^{-1}$ ).

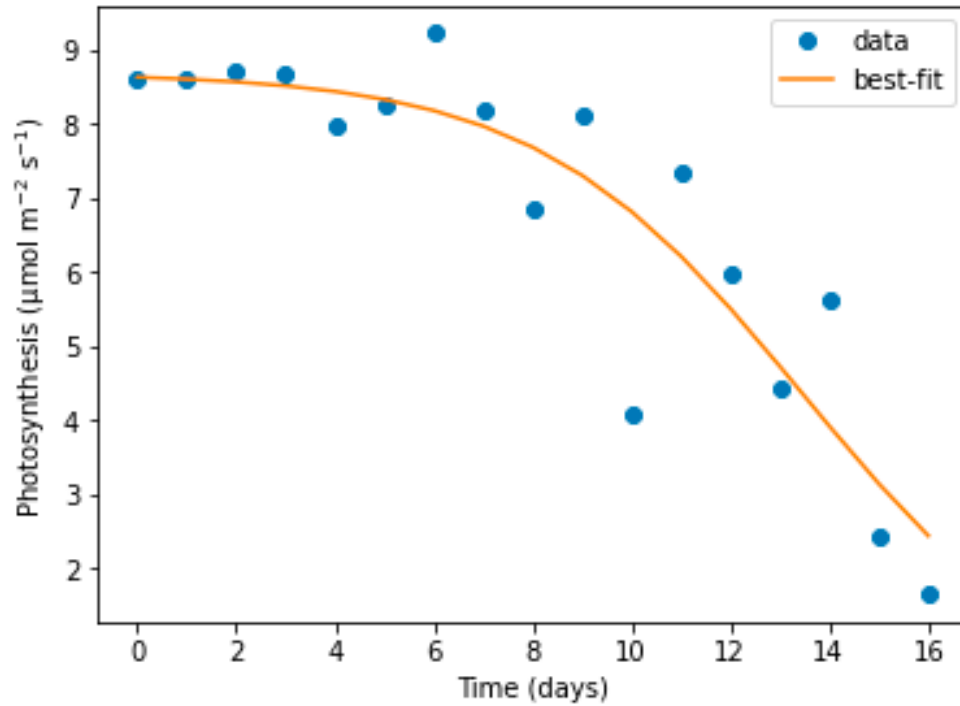

Figure S2. Example of the time course of changes in  $\text{CO}_2$  assimilation during the progression of drought. For this plant, the value of  $I$ ,  $S$ , and  $t_{1/2}$  was  $8.69 \mu\text{mol CO}_2 \text{ m}^{-2} \text{ s}^{-1}$ , 0.37, and 13.4 days, respectively.

Table S2. Percent colonization of *Artemisia tridentata* roots by septate fungi before and after the imposition of drought, and in plants always kept well-watered. Inoculated plants were grown with soil and roots from trap cultures. Medians (and 95% confidence limits) of 4 to 6 plants. Plants sampled before the drought were different from those after the drought. *P*-values from unpaired Wilcoxon tests.

| Colonization                | Non-inoculated    | inoculated        | <i>p</i> -value |
|-----------------------------|-------------------|-------------------|-----------------|
| Total before                | 0.8 (0, 8.6)      | 8.3 (4.5, 11.4)   | 0.060           |
| Microsclerotia before       | 0 (0, 1.8)        | 1.8 (0, 6.4)      | 0.310           |
| Total after                 | 19.4 (0.8, 59.0)  | 21.0 (15.6, 72.8) | 0.329           |
| Microsclerotia after        | 0.6 (0, 6.2)      | 0 (0, 6.1)        | 0.662           |
| Total well-watered          | 34.2 (22.3, 47.9) | 19.3 (5.7, 73.8)  | 0.686           |
| Microsclerotia well-watered | 4.3 (0, 18.8)     | 1.6 (0, 10.8)     | 0.486           |

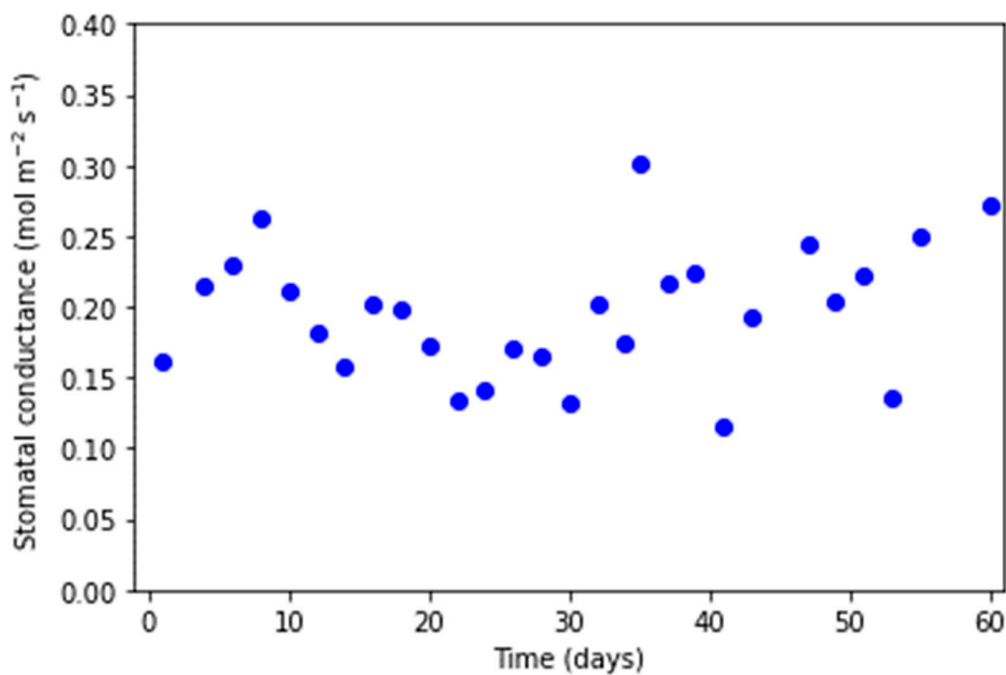

Figure S3. Example of daily variations in stomatal conductance observed in well-watered plants. Similar patterns were observed for CO<sub>2</sub> assimilation, leaf transpiration, and the operating efficiency of photosystem II.

Table S3. Comparison of stomatal conductance ( $g_s$ ), CO<sub>2</sub> assimilation ( $A$ ), leaf transpiration ( $tr_{leaf}$ ), and operating efficiency of photosystem II ( $\Phi_{PSII}$ ) in non-inoculated and inoculated *Artemisia tridentata* plants growing under well-watered conditions. Mean ( $\pm$ SE) of 4 plants; each plant was measured 30 times at 2d intervals over 60 days.  $P$ -values based on t-tests

| Parameter                                                      | Non-inoculated      | inoculated          | $p$ -value |
|----------------------------------------------------------------|---------------------|---------------------|------------|
| $A$ ( $\mu\text{mol CO}_2 \text{ m}^{-2} \text{ s}^{-1}$ )     | 11.4 ( $\pm 0.6$ )  | 10.6 ( $\pm 0.7$ )  | 0.38       |
| $tr_{leaf}$ ( $\text{mol H}_2\text{O m}^{-2} \text{ s}^{-1}$ ) | 4.8 ( $\pm 0.4$ )   | 5.1 ( $\pm 0.1$ )   | 0.48       |
| $g_s$ ( $\text{mol H}_2\text{O m}^{-2} \text{ s}^{-1}$ )       | 0.24 ( $\pm 0.03$ ) | 0.25 ( $\pm 0.01$ ) | 0.75       |
| $\Phi_{PSII}$                                                  | 0.18 ( $\pm 0.01$ ) | 0.17 ( $\pm 0.01$ ) | 0.33       |

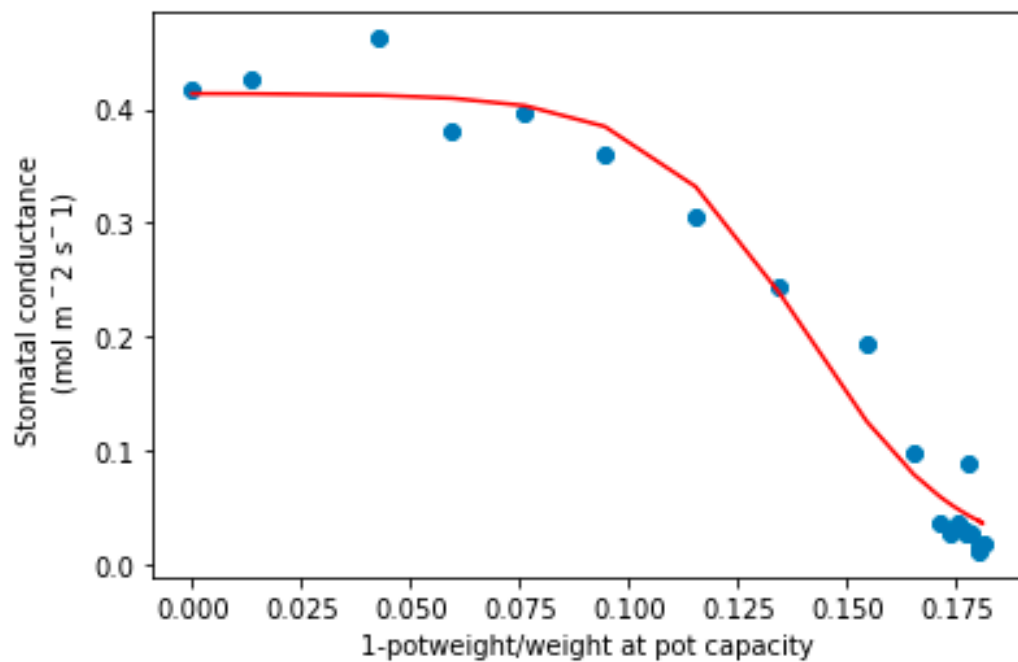

Figure S4. Example of changes in stomatal conductance as the soil dries out. For this plant, the value of  $I$ ,  $S$ , and  $rPC_{1/2}$  was  $0.41 \text{ mol H}_2\text{O m}^{-2} \text{ s}^{-1}$ , 56.9, and 0.86, respectively.

Table S4.  $P$ -values from the two-way ANOVA of the colonization results from the field experiment

|                                     | Inoculation | Sampling time | Inoculation x<br>sampling time |
|-------------------------------------|-------------|---------------|--------------------------------|
| Total AMF<br>colonization           | 0.0004      | 0.020         | 0.759                          |
| Arbuscules                          | 0.0188      | 0.106         | 0.615                          |
| Vesicles                            | 0.316       | 0.602         | 0.191                          |
| Total septate fungi<br>colonization | 0.103       | 0.501         | 0.679                          |
| Microsclerotia                      | 0.168       | 0.222         | 0.999                          |

Table S5. Percent colonization of field-grown *Artemisia tridentata* plants by septate fungi. Inoculated plants were supplemented with soil and roots from trap cultures at transplanting. Plants were harvested eight (spring) or twelve (fall) months after outplanting- Average and standard errors of eight (spring) or four (fall) plants.

| Colonization          | Non-inoculated     | inoculated         | <i>p</i> -value |
|-----------------------|--------------------|--------------------|-----------------|
| Total spring          | 32.5 ( $\pm 4.9$ ) | 43.9 ( $\pm 4.9$ ) | 0.38            |
| Microsclerotia spring | 8.9 ( $\pm 3.3$ )  | 14.3 ( $\pm 3.3$ ) | 0.65            |
| Total fall            | 30.9 ( $\pm 7.0$ ) | 37.2 ( $\pm 7.0$ ) | 0.91            |
| Microsclerotia fall   | 3.8 ( $\pm 4.7$ )  | 9.3 ( $\pm 4.7$ )  | 0.84            |

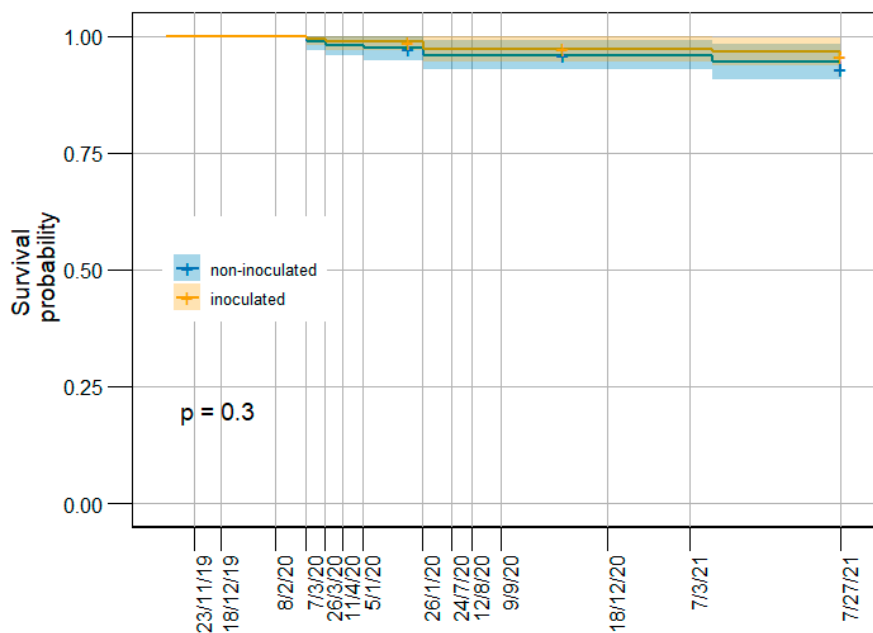

Figure S5. Survival of non-inoculated and inoculated *Artemisia tridentata* seedlings during the first two years after outplanting. Survival curves indicate median survival and 95% confidence intervals; *p*-value based on a log-rank test. The dates indicate when survival was measured.

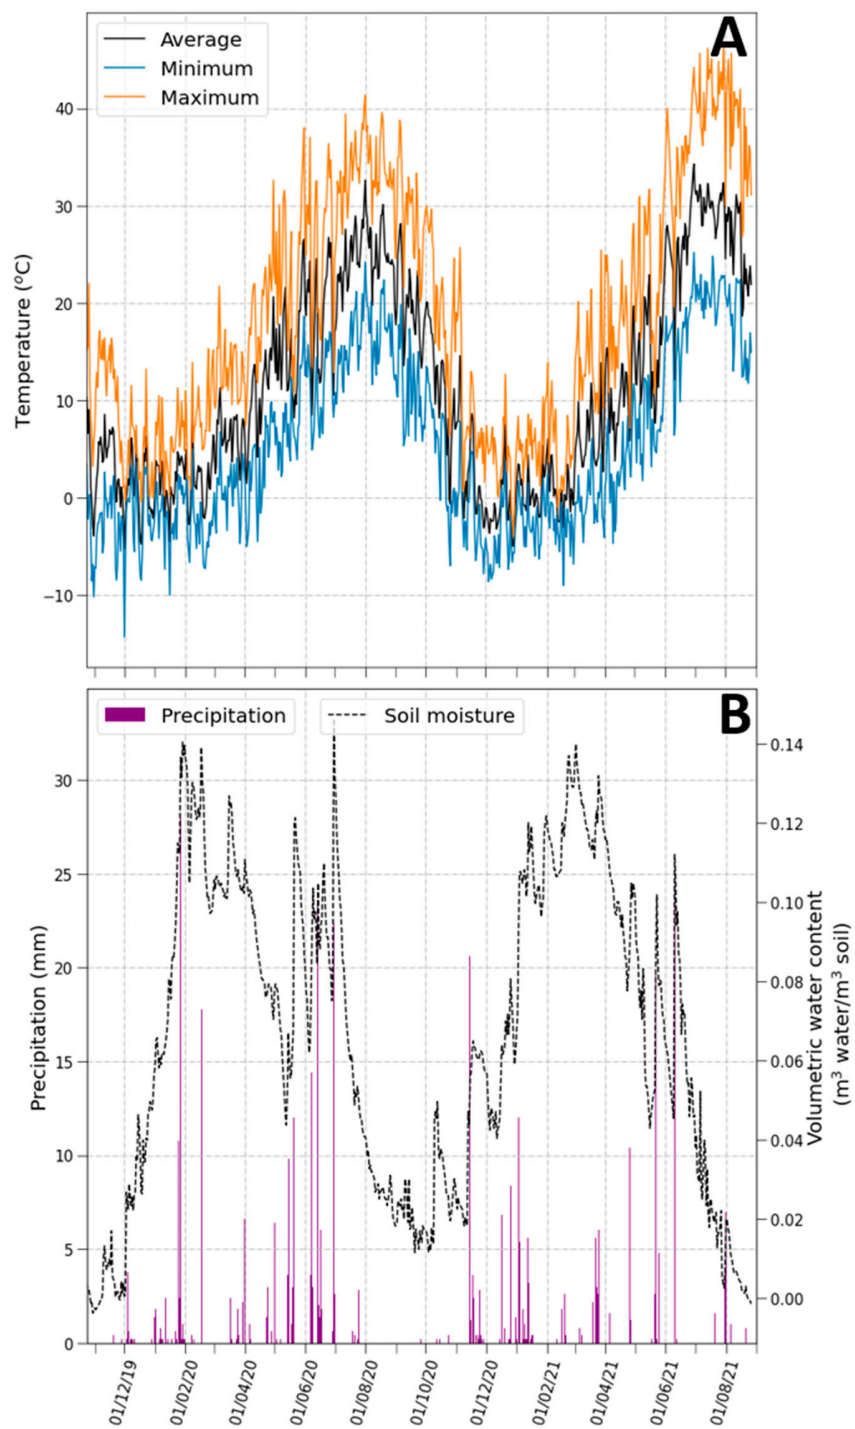

Figure S6. Weather conditions during the experimental period. **A**, Temperature, **B**, Soil moisture in the upper 20 cm of the soil and precipitation.
