# Supplementary material for: Arbuscular Mycorrhizae Alter Photosynthetic Responses to Drought in Seedlings of Artemisia tridentata
Source: Plants (Basel). 2023 Aug 19;12(16):2990. doi: 10.3390/plants12162990 (PMC10458374; doi:10.3390/plants12162990)
Supplement: Supplementary file 1 [file plants-12-02990-s001.zip › Supplementary_Data.xlsx]

## Sheet: Exp1_colonization
Treatment	harvest	both	AMF_Hyphae	Vesicles	Arbuscules	Spores	total_AMF	melanized_hyphae	Hyaline_hyphae	Sclerotia	total_DSE
AMF	before	AMF_before	68.0473	21.3018	21.3018	11.2426	68.0473	1.89941	0.591716	1.65089	4.14201
AMF	before	AMF_before	61.8785	0.552486	56.3536	2.76243	61.8785	0	8.83978	0	8.83978
AMF	before	AMF_before	68.3761	23.0769	44.4444	7.69231	68.3761	0	5.98291	3.4188	8.54701
AMF	before	AMF_before	83.1325	13.8554	71.6867	5.42169	83.1325	0	1.80723	0	1.80723
AMF	before	AMF_before	30.5556	2.77778	7.40741	1.38889	31.9444	0.462963	0.462963	0	0.925926
AMF	before	AMF_before	36.9942	4.04624	23.1214	2.31214	39.3064	1.15607	4.62428	0	5.78035
Control	before	Control_before	0	0	0	0	0	0	6.84932	4.10959	8.90411
Control	before	Control_before	36.4706	0	30.5882	0.588235	36.4706	0	6.47059	0.588235	7.05882
Control	before	Control_before	0	0	0	0	0	2.58065	1.93548	0.516129	9.67742
Control	before	Control_before	0	0	0	0	0	0	3.27869	1.0929	4.37158
Control	before	Control_before	0	0	0	0	0	0	0	3.9548	3.9548
Control	before	Control_before	0	0	0	0	0	0.595238	1.78571	5.95238	6.54762
Control	after	Control_after	0	0	0	0	0	0	0	2.21239	2.21239
Control	after	Control_after	0.383142	0	0	0	0.383142	0	0	0.766284	0.766284
Control	after	Control_after	0	0	0	0	0	3.68664	0.460829	3.68664	6.45161
Control	after	Control_after	12.5926	0	11.4815	0	12.5926	0	0.37037	2.59259	2.96296
Control	after	Control_after	0	0	0	0	0	0	0	1.35135	1.35135
AMF	after	AMF_after	50.6329	21.097	16.0338	4.64135	51.0549	0	0.843882	0	0.843882
AMF	after	AMF_after	46.3964	9.00901	16.6667	3.6036	48.1982	1.35135	2.7027	0	4.05405
AMF	after	AMF_after	55.2846	1.21951	33.7398	0.813008	55.2846	0	0.813008	0	0.813008
AMF	after	AMF_after	39.6739	5.97826	7.06522	3.26087	39.6739	0	0.543478	2.71739	3.26087
AMF	after	AMF_after	43.5185	1.38889	16.6667	4.62963	46.2963	0	0.462963	0	0.462963

## Sheet: Exp1_gas_exchange
Days	ID	treat	Photo	Cond	PhiPS2	Trmmol	WUE	iWUE	lniWUE
0	c1	c	11.198	0.28696	0.462904	5.66278	1.97746	39.0227	3.66414
0	c2	c	5.32298	0.107429	0.436069	2.45994	2.16386	49.5486	3.90295
0	c3	c	9.51086	0.29321	0.528217	3.94632	2.41006	32.437	3.4793
0	c4	c	14.8468	0.382251	0.530725	6.33624	2.34316	38.8405	3.65946
0	c5	c	7.83303	0.248233	0.388609	4.6732	1.67616	31.5551	3.45174
0	a1	a	11.725	0.356474	0.462975	5.88216	1.99331	32.8914	3.49321
0	a2	a	7.55091	0.272737	0.39756	5.11673	1.47573	27.6857	3.32092
0	a3	a	11.7447	0.337498	0.497015	5.65398	2.07725	34.7993	3.5496
0	a4	a	7.33988	0.220039	0.426469	4.25857	1.72356	33.3572	3.50727
0	a5	a	13.9909	0.386458	0.507757	6.50142	2.15197	36.2027	3.58913
1	c1	c	11.7035	0.326374	0.442653	4.9447	2.36688	35.8591	3.5796
1	c2	c	8.17131	0.161252	0.48708	2.85837	2.85873	50.6743	3.92542
1	c3	c	12.2697	0.403775	0.433386	4.71553	2.60197	30.3874	3.41403
1	c4	c	11.8726	0.406405	0.508063	5.70131	2.08243	29.2137	3.37464
1	c5	c	9.75501	0.33441	0.482135	4.9507	1.97043	29.1708	3.37317
1	a1	a	10.1176	0.301869	0.406865	4.6476	2.17694	33.5163	3.51203
1	a2	a	7.53755	0.219436	0.37732	4.31633	1.74629	34.3496	3.53659
1	a3	a	7.68086	0.255403	0.41768	4.91162	1.56381	30.0735	3.40364
1	a4	a	8.62063	0.208656	0.475503	4.14991	2.0773	41.3151	3.72123
1	a5	a	13.0515	0.300586	0.548885	5.51605	2.3661	43.4203	3.77093
2	c1	c	10.346	0.271049	0.423056	5.42888	1.90574	38.1703	3.64206
2	c2	c	7.83538	0.148562	0.479277	3.31508	2.36356	52.7415	3.9654
2	c3	c	5.91091	0.167217	0.391551	3.60883	1.6379	35.3488	3.56526
2	c4	c	11.9948	0.336119	0.466817	6.13023	1.95666	35.6862	3.57476
2	c5	c	7.87069	0.223048	0.418181	4.38031	1.79684	35.287	3.56352
2	a1	a	9.00921	0.222185	0.412142	4.25731	2.11617	40.5481	3.70249
2	a2	a	7.70521	0.20419	0.40132	3.93512	1.95806	37.7355	3.6306
2	a3	a	6.71361	0.19864	0.373958	3.8008	1.76637	33.7978	3.52039
2	a4	a	8.6033	0.16647	0.496027	3.24599	2.65044	51.6808	3.94509
2	a5	a	12.9003	0.318322	0.51776	5.59656	2.30503	40.5258	3.70194
3	c1	c	10.1683	0.289364	0.440863	8.14826	1.24791	35.1403	3.55935
3	c2	c	3.78949	0.0987934	0.450134	3.21569	1.17844	38.3577	3.64695
3	c3	c	12.8558	0.327318	0.502572	8.92574	1.44031	39.2764	3.67062
3	c4	c	10.7356	0.359325	0.434171	9.46714	1.13399	29.8772	3.3971
3	c5	c	10.0639	0.285787	0.461177	7.98226	1.26078	35.2147	3.56146
3	a1	a	9.96857	0.275478	0.440354	7.70466	1.29384	36.1865	3.58869
3	a2	a	12.0742	0.308086	0.452162	8.41069	1.43558	39.1911	3.66845
3	a3	a	7.60003	0.230501	0.422584	6.70048	1.13425	32.9718	3.49565
3	a4	a	8.60247	0.214392	0.489607	6.32037	1.36107	40.125	3.692
3	a5	a	12.3536	0.311363	0.515883	8.48142	1.45655	39.6759	3.68074
4	c1	c	12.313	0.314665	0.383789	5.67964	2.16792	39.1305	3.6669
4	c2	c	7.83383	0.170126	0.43045	3.5311	2.21852	46.0472	3.82967
4	c3	c	9.794	0.260778	0.451734	5.15083	1.90144	37.5569	3.62586
4	c4	c	12.2443	0.325159	0.476602	6.27206	1.95219	37.6562	3.6285
4	c5	c	5.22484	0.147068	0.361439	3.35658	1.5566	35.5268	3.57029
4	a1	a	7.74305	0.251453	0.354409	5.39996	1.43391	30.7932	3.42729
4	a2	a	8.88723	0.245147	0.384612	5.39617	1.64695	36.2526	3.59051
4	a3	a	8.12506	0.222486	0.406168	5.12276	1.58607	36.5194	3.59784
4	a4	a	8.71101	0.208588	0.456143	4.94629	1.76112	41.7618	3.73198
4	a5	a	10.2089	0.255939	0.446837	5.92807	1.72212	39.888	3.68608
5	c1	c	12.1124	0.368812	0.458523	6.23157	1.94371	32.8416	3.4917
5	c2	c	7.5261	0.192583	0.438647	3.84267	1.95856	39.0798	3.66561
5	c3	c	11.0345	0.237055	0.510267	4.68131	2.35715	46.5485	3.84049
5	c4	c	7.03463	0.239833	0.430352	4.81295	1.46161	29.3313	3.37866
5	c5	c	6.65381	0.185643	0.403365	4.0292	1.6514	35.8419	3.57912
5	a1	a	8.78005	0.259489	0.42485	5.42612	1.61811	33.8359	3.52152
5	a2	a	6.68521	0.199931	0.395776	4.5151	1.48063	33.4376	3.50968
5	a3	a	7.86174	0.231353	0.464676	5.18709	1.51564	33.9815	3.52582
5	a4	a	8.68853	0.212149	0.49699	4.92168	1.76536	40.9548	3.71247
5	a5	a	11.1754	0.257244	0.52248	5.79509	1.92842	43.4427	3.77144
6	c1	c	13.6838	0.320377	0.457831	6.00512	2.27869	42.7115	3.75447
6	c2	c	8.7044	0.171411	0.518363	3.56353	2.44263	50.7808	3.92752
6	c3	c	11.8425	0.264853	0.503922	5.01867	2.35969	44.7134	3.80027
6	c4	c	8.11663	0.264434	0.457483	4.27639	1.89801	30.6944	3.42408
6	c5	c	6.74544	0.197872	0.401388	3.92173	1.72002	34.09	3.529
6	a1	a	11.8457	0.286692	0.45207	5.23148	2.26431	41.3184	3.72131
6	a2	a	8.92021	0.226033	0.429991	4.37539	2.03872	39.4642	3.67539
6	a3	a	7.29143	0.183062	0.435091	3.68311	1.97969	39.8303	3.68463
6	a4	a	7.97877	0.1591	0.495112	2.80635	2.84311	50.1493	3.915
6	a5	a	11.7256	0.225442	0.505435	4.34965	2.69575	52.0114	3.95146
7	c1	c	9.55842	0.265701	0.414075	5.11574	1.86843	35.9744	3.58281
7	c2	c	4.37256	0.102861	0.475804	2.45228	1.78306	42.5093	3.74972
7	c3	c	9.22789	0.290326	0.46627	5.45829	1.69062	31.7846	3.45898
7	c4	c	5.28487	0.21303	0.415002	4.55386	1.16053	24.8081	3.21117
7	c5	c	4.53891	0.149238	0.36348	3.46157	1.31123	30.4138	3.4149
7	a1	a	11.6492	0.354451	0.481108	6.45319	1.80518	32.8654	3.49242
7	a2	a	7.36214	0.186872	0.44114	4.17167	1.76479	39.3967	3.67368
7	a3	a	8.34116	0.254634	0.453184	5.29338	1.57577	32.7574	3.48913
7	a4	a	8.27157	0.199396	0.527256	4.04112	2.04685	41.4831	3.72529
7	a5	a	11.1565	0.267041	0.486891	4.92092	2.26716	41.7782	3.73238
8	c1	c	11.0594	0.271999	0.424358	4.72445	2.34089	40.6597	3.70524
8	c2	c	5.16514	0.110433	0.482875	2.34507	2.20255	46.7715	3.84527
8	c3	c	9.21617	0.219521	0.463818	3.96486	2.32446	41.9831	3.73727
8	c4	c	8.26178	0.219318	0.440725	4.16778	1.9823	37.6704	3.62887
8	c5	c	6.39118	0.151373	0.417729	3.12965	2.04214	42.2214	3.74293
8	a1	a	10.9612	0.312816	0.429534	5.36	2.04499	35.0403	3.5565
8	a2	a	8.63155	0.263447	0.382756	4.65565	1.854	32.7639	3.48933
8	a3	a	11.4288	0.316309	0.447254	5.37179	2.12756	36.1318	3.58717
8	a4	a	9.23008	0.226716	0.437617	4.25746	2.16798	40.7121	3.70652
8	a5	a	10.316	0.328448	0.461849	5.99112	1.72189	31.4085	3.44708
9	c1	c	8.16784	0.158957	0.353449	2.58492	3.1598	51.384	3.93933
9	c2	c	3.05126	0.0834812	0.385659	1.54542	1.97439	36.5503	3.59869
9	c3	c	3.79613	0.071007	0.323441	1.38281	2.74523	53.4613	3.97896
9	c4	c	4.70597	0.12374	0.350694	2.3035	2.04297	38.0311	3.6384
9	c5	c	2.63391	0.0803257	0.322922	1.59856	1.64768	32.7903	3.49013
9	a1	a	7.65106	0.157336	0.391499	2.89234	2.64528	48.6288	3.88422
9	a2	a	7.5046	0.22685	0.338529	3.74486	2.00397	33.0817	3.49898
9	a3	a	7.63772	0.279735	0.385044	4.7253	1.61634	27.3034	3.30701
9	a4	a	8.18859	0.183542	0.393938	3.31073	2.47335	44.6143	3.79805
9	a5	a	12.2589	0.311096	0.476038	5.14468	2.38282	39.4054	3.6739
10	c1	c	5.45857	0.102111	0.334675	1.79563	3.03992	53.4573	3.97888
10	c2	c	3.38073	0.0733746	0.382417	1.65408	2.04387	46.0749	3.83027
10	c3	c	-0.805197	0.0181139	0.285216	0.550262	-1.4633	-44.4519
10	c4	c	0.23884	0.0240689	0.323842	0.654948	0.36467	9.92319	2.29487
10	c5	c	-0.333043	0.0234332	0.23847	0.622876	-0.534686	-14.2124
10	a1	a	2.33806	0.0455949	0.311551	1.12149	2.08478	51.2791	3.93728
10	a2	a	6.91426	0.185634	0.388473	3.67195	1.883	37.2468	3.61757
10	a3	a	6.14435	0.178445	0.36355	3.57654	1.71796	34.4326	3.539
10	a4	a	6.86056	0.128975	0.423954	2.67289	2.56672	53.1931	3.97393
10	a5	a	12.42	0.260457	0.492316	4.57653	2.71386	47.6856	3.86463
11	c1	c	3.44109	0.0523088	0.318363	1.08828	3.16196	65.7841	4.18638
11	c2	c	3.88887	0.0366711	0.310044	0.785722	4.94943	106.048	4.66389
11	c4	c	2.18702	0.024904	0.272891	0.555018	3.94045	87.818	4.47527
11	a1	a	3.12766	0.0239024	0.340024	0.553791	5.64772	130.851	4.87406
11	a2	a	7.02999	0.239137	0.303623	4.63444	1.5169	29.3973	3.3809
11	a3	a	5.17328	0.162129	0.313319	3.44854	1.50014	31.9085	3.46287
11	a4	a	5.1194	0.0625094	0.47751	1.46696	3.4898	81.898	4.40548
11	a5	a	3.78866	0.0586973	0.362891	1.38218	2.74109	64.5458	4.16738
12	a2	a	6.35373	0.161211	0.340346	3.11706	2.03838	39.4126	3.67409
12	a3	a	4.30459	0.110473	0.304897	2.2555	1.90849	38.9651	3.66267
12	a4	a	4.09871	0.0512478	0.371297	1.12754	3.63508	79.9783	4.38176
12	a5	a	4.80142	0.091812	0.42761	1.99493	2.40682	52.2962	3.95692
12	c1	c	3.93277	0.0750997	0.362174	1.7367	2.2645	52.3673	3.95828
12	c2	c	3.37857	0.0323142	0.402154	0.792198	4.26481	104.554	4.6497
13	c1	c	3.39186	0.0416433	0.299641	0.877793	3.86407	81.4503	4.39999
13	c2	c	3.38492	0.06683	0.430862	1.38373	2.44623	50.6497	3.92493
13	a2	a	7.74273	0.216579	0.421452	3.80144	2.03679	35.7501	3.57655
13	a3	a	3.56987	0.107056	0.339593	2.20267	1.6207	33.3457	3.50693
13	a4	a	7.35936	0.135707	0.470352	3.02989	2.42892	54.23	3.99323
13	a5	a	5.82069	0.097665	0.486642	2.38793	2.43755	59.5985	4.08763
14	a2	a	4.58086	0.0697198	0.313147	1.3697	3.34441	65.7038	4.18516
14	a3	a	2.94505	0.05967	0.31231	1.20709	2.4398	49.3556	3.89905
14	a4	a	5.98909	0.0668454	0.431014	1.37928	4.34217	89.5961	4.49531
14	a5	a	10.9976	0.25074	0.494315	4.4078	2.49504	43.8607	3.78102
14	c1	c	-0.317919	0.0173096	0.193087	0.38467	-0.826471	-18.3666
14	c2	c	1.74775	0.0396174	0.415615	0.865192	2.02007	44.1157	3.78682
15	a2	a	5.14415	0.076576	0.406658	1.6576	3.10338	67.1771	4.20733
15	a3	a	1.50196	0.0521154	0.31434	1.2162	1.23496	28.82	3.36107
15	a4	a	4.43071	0.0566016	0.464218	1.3467	3.29004	78.2787	4.36028
15	a5	a	9.61483	0.154638	0.486157	3.25612	2.95285	62.1766	4.12998
15	c2	c	3.99812	0.0623038	0.489299	1.50792	2.65141	64.1713	4.16156
16	c2	c	3.36894	0.0451844	0.378702	0.800013	4.2111	74.5598	4.3116
16	a2	a	4.14778	0.0723523	0.278159	1.25521	3.30446	57.3275	4.04878
16	a3	a	1.9162	0.0299042	0.240949	0.568421	3.37109	64.0779	4.1601
16	a4	a	5.63423	0.0819004	0.36904	1.48509	3.79386	68.7938	4.23111
16	a5	a	7.05174	0.15236	0.34858	2.56726	2.7468	46.2833	3.83478
17	a2	a	2.40701	0.0349036	0.175666	0.690114	3.48785	68.9617	4.23355
17	a4	a	2.43549	0.0336732	0.324297	0.683985	3.56074	72.3274	4.2812
17	a5	a	6.83211	0.107846	0.401553	2.04044	3.34835	63.3505	4.14868
17	c2	c	2.38815	0.0576093	0.422819	1.16188	2.05542	41.4543	3.72459
18	c2	c	4.73133	0.0555377	0.407742	0.940493	5.03069	85.1913	4.4449
18	a2	a	0.943575	0.0283632	0.20411	0.487302	1.93633	33.2676	3.50458
18	a4	a	1.65592	0.0218741	0.292367	0.376087	4.40303	75.7023	4.32681
18	a5	a	4.75276	0.059742	0.347515	0.959218	4.95483	79.5547	4.37645
19	c2	c	1.02245	0.0215091	0.363715	0.428493	2.38615	47.5357	3.86148
19	a5	a	0.298096	0.0213374	0.256432	0.423729	0.703505	13.9706	2.63695

## Sheet: Exp1_water_potential
Time	Treatment	Ψleaf (Mpa)
Before_witholding_watering	non-inoculated	-0.9
Before_witholding_watering	non-inoculated	-1.1
Before_witholding_watering	non-inoculated	-1.2
Before_witholding_watering	non-inoculated	-0.84
Before_witholding_watering	non-inoculated	-1.2
Before_witholding_watering	non-inoculated	-1.17
Before_witholding_watering	inoculated	-1
Before_witholding_watering	inoculated	-0.9
Before_witholding_watering	inoculated	-1.1
Before_witholding_watering	inoculated	-1.16
Before_witholding_watering	inoculated	-0.97
Before_witholding_watering	inoculated	-1.18
After_stomatal_closure	non-inoculated	-2.87
After_stomatal_closure	non-inoculated	-2.9
After_stomatal_closure	non-inoculated	-3.82
After_stomatal_closure	non-inoculated	-4.314
After_stomatal_closure	non-inoculated	-3.3
After_stomatal_closure	inoculated	-2.98
After_stomatal_closure	inoculated	-3.19
After_stomatal_closure	inoculated	-4.5
After_stomatal_closure	inoculated	-3.65
After_stomatal_closure	inoculated	-5

## Sheet: Exp2_colonization
Treatment	both	Total_AMF	arbuscules	Storage	Total_DSE	Sclerotia
Control	BC	0.806452	0.806452	0	0.806452	0		BC = non-inoculated before drought
Control	BC	0.952381	0	0	8.57143	0		BA = inoculated-before drought
Control	BC	0	0	0	3.7037	1.85185		WC = non-inoculated always well-watered
Control	BC	0	0	0	0	0		WA = inoculated always well-watered
Control	BC	0	0	0	0	0		CD = non-inoculated after drought
AMF	BA	20.5882	6.86275	1.96078	10.7843	0		DA = inoculated after drought
AMF	BA	17.6991	1.76991	2.65487	6.19469	1.76991
AMF	BA	22.3214	14.2857	0.892857	4.46429	1.78571
AMF	BA	14.2857	3.80952	2.85714	11.4286	1.90476
AMF	BA	22.0183	11.9266	1.83486	8.25688	6.42202
Control	WC	1.17647	0	0	24.7059	1.17647
Control	WC	0.826446	0	0	22.314	7.43802
Control	WC	0	0	0	47.9339	0
Control	WC	4.46429	0.892857	0	43.75	18.75
AMF	WA	39.2308	19.2308	4.61538	73.8462	10.7692
AMF	WA	23.3184	15.6951	0.44843	8.52018	0
AMF	WA	42.623	30.3279	3.27869	5.7377	3.27869
AMF	WA	22.0721	13.5135	0.900901	30.1802	0
Control	DC	0	0	0	1.68067	0
Control	DC	3.48837	0	0	68.6047	1.16279
Control	DC	3.09278	0	0	49.4845	4.12371
Control	DC	6.36364	3.63636	0.909091	33.6364	8.18182
Control	DC	0	0	0	0	0
Control	DC	0	0	0	5.10204	0
AMF	DA	43.6893	14.5631	1.94175	72.8155	0
AMF	DA	32.2917	9.375	1.04167	15.625	0
AMF	DA	16.6667	0	2.08333	19.7917	0
AMF	DA	32.3232	3.0303	2.0202	69.697	6.06061
AMF	DA	29.4737	6.31579	2.10526	21.0526	0

## Sheet: Exp2_gas_exchange
days	Treatment	plant	Fraction_PC	Photo	Cond	PhiPS2	Trmmol	WUE	iWUE
1	A	ad1	1	11.5977	0.280702	0.179854	5.73411	2.02258	41.3167
2	A	ad1	0.989212	9.93554	0.304164	0.142013	5.53505	1.79502	32.6651
5	A	ad1	0.964315	16.9061	0.38932	0.188872	5.51647	3.06465	43.4247
7	A	ad1	0.948548	16.5111	0.360022	0.235371	5.76826	2.8624	45.8613
9	A	ad1	0.93112	15.6382	0.284591	0.225711	4.84199	3.22969	54.9496
11	A	ad1	0.914523	15.5525	0.315911	0.206945	5.41238	2.8735	49.2306
13	A	ad1	0.892946	15.9052	0.279149	0.189945	3.79447	4.19169	56.9776
15	A	ad1	0.875519	13.1224	0.257039	0.236665	6.22329	2.10859	51.0521
17	A	ad1	0.856432	12.4435	0.235846	0.199305	4.77596	2.60544	52.761
19	A	ad1	0.842324	8.15526	0.163709	0.15272	3.37587	2.41575	49.8157
21	A	ad1	0.832365	4.12884	0.0571359	0.139152	1.40353	2.94176	72.2634
23	A	ad1	0.828216	2.02901	0.0384849	0.114743	0.898898	2.25722	52.7222
25	A	ad1	0.825726	0.0685223	0.0301985	0.0875621	0.744503	0.0920375	2.26906
27	A	ad1	0.824066	0.601477	0.0272067	0.0392247	0.702057	0.856735	22.1077
29	A	ad1	0.823651	0.0844148	0.0325405	0.0256327	0.795172	0.106159	2.59414
31	A	ad1	0.823237	-0.235206	0.0380259	0.0184068	0.746426	-0.31511	-6.18541
33	A	ad1	0.822407	0.17751	0.0183637	0.0176565	0.390824	0.454194	9.66633
36	A	ad1	0.821577	0.131956	0.019739	0.015228	0.591767	0.222987	6.68505
38	A	ad1	0.820747	0.499141	0.0158126	0.0104177	0.453331	1.10105	31.566
1	A	ad2	1	9.18699	0.10856	0.150525	3.09709	2.96633	84.6256
4	A	ad2	0.991055	8.41176	0.139007	0.15587	2.65553	3.16764	60.5134
6	A	ad2	0.976744	6.65242	0.175736	0.132957	3.71217	1.79206	37.8546
8	A	ad2	0.960644	11.8406	0.204894	0.175266	4.01464	2.94937	57.7892
10	A	ad2	0.94186	14.1201	0.183129	0.226244	4.03447	3.49985	77.1045
12	A	ad2	0.92576	12.7411	0.163937	0.197703	3.05829	4.1661	77.7198
14	A	ad2	0.908766	13.7665	0.178644	0.174045	3.43387	4.00903	77.0611
16	A	ad2	0.890877	12.0461	0.184002	0.198214	3.60677	3.33987	65.4673
18	A	ad2	0.872093	12.5864	0.238841	0.185382	4.69931	2.67835	52.6979
20	A	ad2	0.858676	15.9281	0.228189	0.226464	5.30779	3.00089	69.8023
22	A	ad2	0.834526	7.17281	0.111796	0.149303	2.75946	2.59936	64.16
24	A	ad2	0.832737	10.9178	0.0955779	0.149044	2.24148	4.87078	114.229
26	A	ad2	0.830948	7.70848	0.107942	0.130368	2.84941	2.70529	71.413
28	A	ad2	0.828265	4.69408	0.0783569	0.109539	1.94863	2.40891	59.9064
30	A	ad2	0.825581	7.31127	0.0772523	0.120955	1.72615	4.23559	94.6414
32	A	ad2	0.822898	5.14971	0.0817932	0.108379	2.05871	2.50143	62.9601
34	A	ad2	0.820215	6.20186	0.0579705	0.136892	1.65667	3.74358	106.983
35	A	ad2	0.818724	5.99301	0.0593156	0.129383	1.54357	3.88255	101.036
37	A	ad2	0.817233	5.05432	0.0673958	0.105832	1.44852	3.4893	74.9946
39	A	ad2	0.815742	3.68104	0.0496364	0.114152	1.31206	2.80555	74.1601
41	A	ad2	0.813953	3.34022	0.0347678	0.100173	0.716288	4.66323	96.0721
43	A	ad2	0.812165	3.41229	0.0442596	0.107027	0.928742	3.6741	77.0972
47	A	ad2	0.809481	2.31877	0.0296268	0.0938739	0.748219	3.09905	78.2659
49	A	ad2	0.807692	1.22005	0.0174783	0.0705747	0.455159	2.6805	69.8039
51	A	ad2	0.807692	1.95044	0.0223187	0.0779795	0.67115	2.90612	87.3905
53	A	ad2	0.807692	2.26179	0.0167599	0.0552861	0.434159	5.2096	134.953
55	A	ad2	0.806798	1.20101	0.0244831	0.0680535	0.688395	1.74466	49.0547
1	A	ad3	1	12.5326	0.255476	0.210528	5.80541	2.15877	49.0557
2	A	ad3	0.986492	12.2621	0.266883	0.191366	5.98461	2.04895	45.9457
5	A	ad3	0.962092	12.2544	0.306566	0.205896	4.88194	2.51014	39.9731
7	A	ad3	0.947277	13.7995	0.369936	0.207212	5.76123	2.39523	37.3023
9	A	ad3	0.933333	13.6894	0.355522	0.211285	5.80575	2.35791	38.5051
11	A	ad3	0.918519	15.3225	0.3544	0.231834	6.11839	2.50434	43.2351
13	A	ad3	0.901961	15.1957	0.376957	0.230764	5.82794	2.60738	40.3114
15	A	ad3	0.885403	18.3426	0.451258	0.264805	6.79345	2.70005	40.6478
17	A	ad3	0.866231	12.8355	0.413528	0.192124	6.60112	1.94445	31.0391
19	A	ad3	0.851416	13.4384	0.360496	0.243581	6.65798	2.01839	37.2775
21	A	ad3	0.83573	13.3331	0.224336	0.209178	4.11402	3.2409	59.4335
23	A	ad3	0.826144	8.75335	0.128189	0.190441	3.26005	2.68503	68.2846
25	A	ad3	0.820915	5.94475	0.119605	0.141666	2.67638	2.22119	49.7032
27	A	ad3	0.816558	5.14102	0.079513	0.135942	2.13436	2.40869	64.6563
29	A	ad3	0.813508	4.79314	0.0871721	0.125699	2.27253	2.10916	54.9848
31	A	ad3	0.810458	5.44979	0.0920897	0.0769112	1.65402	3.29488	59.1791
33	A	ad3	0.808715	5.94619	0.0740435	0.122898	1.8977	3.13337	80.3067
36	A	ad3	0.805229	-0.955128	0.0359664	0.0733559	0.982817	-0.971827	-26.5561
38	A	ad3	0.803486	0.134194	0.0311638	0.0746618	0.818702	0.163911	4.30609
40	A	ad3	0.802614	-0.0147084	0.0223256	0.046541	0.496168	-0.0296441	-0.658815
42	A	ad3	0.801743	1.40169	0.0103487	0.0456822	0.226798	6.18036	135.447
46	A	ad3	0.799129	1.91382	0.00975693	0.0344435	0.262	7.30464	196.15
48	A	ad3	0.8	1.35195	0.027174	0.0357257	0.747164	1.80945	49.7517
50	A	ad3	0.797386	0.122252	0.0321196	0.0289345	0.867738	0.140886	3.80617
52	A	ad3	0.798257	1.24095	0.0123675	0.0265488	0.38025	3.2635	100.339
54	A	ad3	0.798257	0.0224928	0.0163015	0.0268795	0.399286	0.0563326	1.3798
1	A	ad4	1	14.1892	0.197376	0.19009	5.01152	2.83131	71.8892
4	A	ad4	0.983092	14.501	0.321058	0.198314	5.54386	2.61568	45.1662
6	A	ad4	0.974235	12.7846	0.282673	0.197209	5.318	2.40403	45.2276
8	A	ad4	0.963768	16.7479	0.359999	0.213211	6.0015	2.79061	46.522
10	A	ad4	0.951691	18.7397	0.328448	0.27717	6.60226	2.83837	57.0552
12	A	ad4	0.941224	11.7767	0.273764	0.19012	4.84333	2.43152	43.0175
14	A	ad4	0.929952	15.9301	0.336857	0.200435	6.34967	2.50881	47.2905
16	A	ad4	0.919485	13.4204	0.254256	0.219901	4.90729	2.73478	52.7829
18	A	ad4	0.909018	12.8896	0.242188	0.208249	4.73408	2.72272	53.2213
20	A	ad4	0.899356	14.0943	0.243329	0.223518	5.99315	2.35174	57.9228
22	A	ad4	0.888084	10.9113	0.158152	0.183854	3.73385	2.92225	68.9923
24	A	ad4	0.880435	18.3336	0.21852	0.231777	4.64671	3.94551	83.8991
26	A	ad4	0.872786	12.7734	0.228245	0.200753	5.0333	2.53779	55.9638
28	A	ad4	0.867418	10.4966	0.216036	0.181212	4.58199	2.29084	48.5874
30	A	ad4	0.86205	16.5492	0.257827	0.204938	4.92679	3.35903	64.1874
32	A	ad4	0.856683	13.2044	0.261096	0.175892	5.63295	2.34413	50.5728
34	A	ad4	0.849436	15.4147	0.290694	0.20328	5.90312	2.61128	53.0272
35	A	ad4	0.844605	15.1918	0.276329	0.209633	5.33161	2.84938	54.9772
37	A	ad4	0.839775	15.5239	0.28273	0.182731	5.01405	3.09608	54.9072
39	A	ad4	0.834944	12.9914	0.262316	0.206993	5.69113	2.28274	49.5256
41	A	ad4	0.827697	11.5364	0.193169	0.167872	3.23943	3.56125	59.722
43	A	ad4	0.821256	10.6086	0.161599	0.204418	3.84341	2.76021	65.6475
47	A	ad4	0.813205	6.97307	0.0857792	0.165797	2.04461	3.41046	81.291
49	A	ad4	0.809984	5.66639	0.0656764	0.14264	1.59436	3.55402	86.2775
51	A	ad4	0.808374	3.81917	0.036932	0.139972	1.07017	3.56875	103.411
53	A	ad4	0.807568	1.38701	0.0153768	0.0912589	0.457987	3.0285	90.2019
55	A	ad4	0.806763	2.13404	0.0363824	0.105383	1.01349	2.10563	58.6559
58	A	ad4	0.805153	0.914198	0.0223437	0.0731746	0.533115	1.71482	40.9152
60	A	ad4	0.804348	0.522378	0.0246675	0.0764019	0.739458	0.706434	21.1767
1	A	ad5	1	4.53774	0.175344	0.150243	4.29788	1.05581	25.879
4	A	ad5	0.975455	5.02923	0.149784	0.138777	3.18297	1.58004	33.5765
6	A	ad5	0.960909	5.79135	0.154526	0.163871	3.24718	1.7835	37.4781
8	A	ad5	0.948182	4.48595	0.15225	0.155044	3.10191	1.44619	29.4645
10	A	ad5	0.93	4.38451	0.119641	0.162217	3.09606	1.41616	36.6472
12	A	ad5	0.915455	3.80663	0.106234	0.152066	2.31713	1.64282	35.8324
14	A	ad5	0.899091	4.54515	0.104947	0.164202	2.43588	1.86592	43.309
16	A	ad5	0.885455	4.73591	0.106068	0.176339	2.5096	1.88711	44.6498
18	A	ad5	0.871818	4.99289	0.10652	0.16065	2.3652	2.11098	46.8729
20	A	ad5	0.86	4.66113	0.0892321	0.156542	2.41511	1.92998	52.236
22	A	ad5	0.847273	5.05482	0.0855561	0.130515	1.94848	2.59424	59.082
24	A	ad5	0.838636	3.519	0.0896087	0.166937	2.55238	1.37872	39.2708
26	A	ad5	0.83	4.59733	0.0941989	0.140892	2.26756	2.02744	48.8045
28	A	ad5	0.823939	2.76526	0.0939211	0.126373	2.27536	1.21531	29.4424
30	A	ad5	0.817879	4.31424	0.0915111	0.143675	2.6252	1.6434	47.1445
32	A	ad5	0.811818	4.10905	0.0861959	0.137194	2.09069	1.9654	47.6711
34	A	ad5	0.806364	4.84555	0.0855055	0.133454	2.05169	2.36174	56.6695
35	A	ad5	0.801818	4.65965	0.0739556	0.144452	1.76411	2.64136	63.006
37	A	ad5	0.797273	4.62435	0.0733868	0.130148	1.68108	2.75082	63.0134
39	A	ad5	0.792727	3.45954	0.0690833	0.130978	1.75013	1.97674	50.0778
41	A	ad5	0.786364	3.59898	0.0559483	0.157198	1.53308	2.34756	64.327
43	A	ad5	0.780909	3.29003	0.0507755	0.137926	1.23746	2.65869	64.7957
47	A	ad5	0.770909	2.01969	0.0542559	0.127105	1.24252	1.62548	37.2252
49	A	ad5	0.765455	3.001	0.0402627	0.127884	1.05172	2.85342	74.5356
51	A	ad5	0.761818	3.2078	0.0311603	0.132395	0.870805	3.68372	102.945
53	A	ad5	0.76	2.96368	0.0211139	0.0937956	0.555407	5.33605	140.367
55	A	ad5	0.758182	1.83462	0.0291116	0.0946738	0.771842	2.37693	63.02
58	A	ad5	0.754545	1.60053	0.0209368	0.0830441	0.503462	3.17904	76.4458
60	A	ad5	0.753636	1.03197	0.0162058	0.106653	0.455583	2.26516	63.679
1	C	cd1	1	13.6334	0.222774	0.206891	5.66691	2.40579	61.1983
4	C	cd1	0.980174	9.46533	0.231311	0.21924	3.80525	2.48744	40.9203
6	C	cd1	0.968279	5.45343	0.242716	0.160776	4.58926	1.1883	22.4683
8	C	cd1	0.955591	9.00354	0.209323	0.191149	3.92464	2.29411	43.0127
10	C	cd1	0.940523	7.82629	0.201251	0.183893	3.8297	2.04358	38.8883
12	C	cd1	0.927835	4.93553	0.174898	0.141347	3.17734	1.55335	28.2194
14	C	cd1	0.915147	7.77458	0.209107	0.177937	3.65269	2.12845	37.18
16	C	cd1	0.904044	9.2184	0.252582	0.200112	4.45511	2.06917	36.4967
18	C	cd1	0.891356	9.64252	0.286264	0.199456	5.16912	1.86541	33.6841
20	C	cd1	0.88184	6.64513	0.221245	0.188056	4.05307	1.63953	30.0352
22	C	cd1	0.860428	10.7393	0.261797	0.196034	4.77228	2.25035	41.0216
24	C	cd1	0.858446	10.3225	0.172325	0.151811	3.75899	2.74609	59.9013
26	C	cd1	0.856463	5.52005	0.133792	0.137954	2.98077	1.85189	41.2586
28	C	cd1	0.85382	2.37537	0.0901478	0.119586	2.28729	1.03851	26.3497
30	C	cd1	0.851176	4.55769	0.0834954	0.0979873	1.845	2.47029	54.5862
32	C	cd1	0.848533	3.44637	0.0778871	0.102764	1.97624	1.7439	44.2483
34	C	cd1	0.846947	1.77435	0.0538452	0.0906603	1.2521	1.4171	32.9528
35	C	cd1	0.84589	1.63152	0.0460907	0.0924259	1.22205	1.33507	35.398
37	C	cd1	0.844832	1.60084	0.0350998	0.0858393	0.772571	2.0721	45.6084
39	C	cd1	0.843775	1.2096	0.0453129	0.0929546	1.15669	1.04574	26.6945
41	C	cd1	0.842189	0.216659	0.017127	0.0644618	0.395814	0.547376	12.6501
43	C	cd1	0.841396	0.758896	0.0147968	0.0619941	0.288519	2.63032	51.2878
47	C	cd1	0.840603	0.589454	0.021644	0.0629791	0.509421	1.15711	27.234
49	C	cd1	0.839017	0.684047	0.0103104	0.0481746	0.262518	2.60571	66.345
51	C	cd1	0.839017	0.73265	0.0223627	0.0313832	0.587474	1.24712	32.7621
53	C	cd1	0.839017	0.933218	0.0263945	0.034992	0.515337	1.81089	35.3566
55	C	cd1	0.839017	-0.334701	0.0160105	0.0564209	0.391291	-0.855375	-20.9051
1	C	cd2	1	17.5986	0.416903	0.248316	8.47535	2.07644	42.2127
2	C	cd2	0.986256	19.6008	0.4256	0.265932	8.4593	2.31708	46.0547
5	C	cd2	0.957101	16.8332	0.462329	0.208799	6.63362	2.53756	36.4096
7	C	cd2	0.940441	15.9836	0.381399	0.216603	5.94017	2.69076	41.9077
9	C	cd2	0.923782	13.3091	0.395755	0.182607	6.32121	2.10547	33.6297
11	C	cd2	0.905456	14.1814	0.360056	0.200385	6.29206	2.25386	39.3866
13	C	cd2	0.884631	13.9449	0.305657	0.206202	4.69603	2.96951	45.6229
15	C	cd2	0.865473	9.7494	0.244824	0.19018	5.47082	1.78207	39.8221
17	C	cd2	0.845481	8.36389	0.193758	0.17905	4.30178	1.94429	43.1666
19	C	cd2	0.834652	4.60247	0.0971284	0.146049	2.28502	2.01419	47.3854
21	C	cd2	0.828821	1.73831	0.0367328	0.101407	0.897343	1.93717	47.323
23	C	cd2	0.826322	2.50261	0.0270299	0.101357	0.835843	2.99412	92.5866
25	C	cd2	0.824656	0.529741	0.0357414	0.0727362	0.886984	0.597238	14.8215
27	C	cd2	0.82299	2.14988	0.0285156	0.0594368	0.808752	2.65827	75.3932
29	C	cd2	0.822574	1.27183	0.026317	0.0497884	0.701476	1.81308	48.3273
31	C	cd2	0.822157	-0.153158	0.0284733	0.0310566	1.58093	-0.0968784	-5.379
33	C	cd2	0.821324	0.644792	0.0265411	0.0253437	0.680069	0.948128	24.2941
36	C	cd2	0.818825	-0.155601	0.0188303	0.0135483	0.574291	-0.270944	-8.26333
38	C	cd2	0.819658	0.122333	0.0162906	0.0062054	0.460962	0.265387	7.50946
40	C	cd2	0.819658	-0.0360278	0.0114954	0.0068364	0.25043	-0.143864	-3.13412
1	C	cd3	1	11.8838	0.200051	0.208018	5.24804	2.26444	59.4042
4	C	cd3	0.971429	7.88751	0.224658	0.182233	4.2237	1.86744	35.1089
6	C	cd3	0.956735	4.53922	0.192794	0.128039	4.00263	1.13406	23.5445
8	C	cd3	0.942041	7.92219	0.189233	0.166052	3.82044	2.07364	41.8648
10	C	cd3	0.924898	6.97706	0.16888	0.171498	3.95748	1.76301	41.3137
12	C	cd3	0.909388	3.77098	0.148085	0.162757	2.98021	1.26534	25.4649
14	C	cd3	0.893061	8.03466	0.190139	0.148591	3.84857	2.0877	42.2568
16	C	cd3	0.878367	7.26226	0.190052	0.162448	3.69613	1.96483	38.212
18	C	cd3	0.862857	7.69382	0.167608	0.176025	3.56212	2.1599	45.9035
20	C	cd3	0.853061	3.60875	0.0948852	0.150271	2.93258	1.23057	38.0328
22	C	cd3	0.844082	1.47389	0.0614774	0.100076	1.75814	0.838327	23.9746
24	C	cd3	0.842041	3.38851	0.0313814	0.0654921	0.822938	4.11758	107.978
26	C	cd3	0.84	1.02494	0.0333603	0.0331139	0.980111	1.04574	30.7234
28	C	cd3	0.839456	-0.760113	0.0235194	0.027313	0.650543	-1.16843	-32.3185
30	C	cd3	0.838912	1.42495	0.022239	0.0166842	0.568468	2.50664	64.0743
32	C	cd3	0.838367	0.745416	0.0275319	0.0238881	0.759376	0.981617	27.0746
34	C	cd3	0.837551	1.07119	0.0190339	0.0237362	0.565893	1.89292	56.2781
35	C	cd3	0.837007	1.26684	0.017404	0.0189379	0.495483	2.55678	72.7904
37	C	cd3	0.836463	1.09832	0.0230511	0.0211923	0.563655	1.94856	47.6471
39	C	cd3	0.835918	0.398287	0.0231127	0.0179734	0.676758	0.588522	17.2324
41	C	cd3	0.835918	0.354936	0.01104	0.0206986	0.250538	1.4167	32.1499
1	C	cd4	1	8.84688	0.203525	0.204573	5.18141	1.70743	43.4683
2	C	cd4	0.989346	9.10896	0.202998	0.205236	5.16374	1.76402	44.8723
5	C	cd4	0.968798	6.9815	0.160821	0.158021	3.20011	2.18165	43.4117
7	C	cd4	0.958143	10.4645	0.246165	0.188248	4.50022	2.32533	42.5101
9	C	cd4	0.947489	7.33851	0.267674	0.163135	5.04933	1.45336	27.4158
11	C	cd4	0.937595	8.64468	0.225096	0.16961	4.57545	1.88936	38.4045
13	C	cd4	0.92618	7.25379	0.173317	0.174281	3.52047	2.06046	41.8527
15	C	cd4	0.914764	8.1569	0.174814	0.168085	3.32084	2.45627	46.6604
17	C	cd4	0.903349	4.30003	0.134242	0.149975	3.12853	1.37446	32.0319
19	C	cd4	0.893455	9.40711	0.194245	0.204825	4.36481	2.15521	48.429
21	C	cd4	0.882801	7.96631	0.18883	0.153048	3.69143	2.15805	42.1876
23	C	cd4	0.872146	5.77284	0.133172	0.164874	3.25215	1.77509	43.3489
25	C	cd4	0.864536	5.98257	0.144654	0.140704	3.11814	1.91863	41.3579
27	C	cd4	0.857686	5.60801	0.110097	0.111401	2.65776	2.11005	50.9371
29	C	cd4	0.85274	4.36739	0.10911	0.10908	2.82575	1.54557	40.0275
31	C	cd4	0.847793	2.87747	0.13483	0.0797172	2.27215	1.26641	21.3415
33	C	cd4	0.843988	5.17956	0.0969648	0.123639	2.52775	2.04908	53.417
36	C	cd4	0.8379	3.16197	0.0627246	0.119444	1.60448	1.97072	50.4104
38	C	cd4	0.835616	0.971769	0.065125	0.111814	1.70156	0.571106	14.9216
40	C	cd4	0.834094	1.55898	0.0251951	0.104272	0.571024	2.73015	61.8765
42	C	cd4	0.832572	1.53555	0.0241423	0.0802602	0.567136	2.70755	63.6042
46	C	cd4	0.829528	3.19973	0.0254089	0.0835387	0.772517	4.14195	125.929
48	C	cd4	0.830289	1.10584	0.0231114	0.0656267	0.612685	1.80491	47.8482
50	C	cd4	0.828006	1.25395	0.0508369	0.0496807	1.28926	0.972616	24.6662
52	C	cd4	0.829528	1.49634	0.0122437	0.0640563	0.361097	4.14386	122.213
54	C	cd4	0.828767	0.294795	0.025367	0.0461912	0.583179	0.505497	11.6212
1	C	cd5	1	11.9752	0.307578	0.217427	6.64865	1.80114	38.9337
4	C	cd5	0.978022	13.8463	0.329803	0.219967	5.49362	2.52044	41.9837
6	C	cd5	0.967033	16.3416	0.373313	0.22069	6.19596	2.63746	43.7746
8	C	cd5	0.956044	15.8916	0.362969	0.238726	6.02899	2.63587	43.7823
10	C	cd5	0.942519	16.0677	0.318483	0.237371	6.62789	2.42426	50.4507
12	C	cd5	0.932375	21.4724	0.43173	0.234142	6.34057	3.3865	49.7356
14	C	cd5	0.919696	18.6826	0.341272	0.20729	6.46704	2.88889	54.744
16	C	cd5	0.909552	16.8243	0.396707	0.212941	6.38244	2.63603	42.4099
18	C	cd5	0.897718	16.3616	0.337288	0.210038	5.73834	2.85128	48.5094
20	C	cd5	0.888419	12.0918	0.225153	0.179892	5.23322	2.31059	53.7047
22	C	cd5	0.87743	15.0646	0.210697	0.194244	4.29137	3.51043	71.4987
24	C	cd5	0.870668	15.6632	0.21389	0.26557	5.54306	2.82574	73.2303
26	C	cd5	0.863905	12.4969	0.242393	0.169245	4.86561	2.56841	51.5563
28	C	cd5	0.859115	12.767	0.23136	0.168279	4.77708	2.67254	55.1822
30	C	cd5	0.854325	16.5888	0.258226	0.171701	5.3242	3.11573	64.2414
32	C	cd5	0.849535	10.5266	0.179252	0.177844	4.09845	2.56843	58.725
34	C	cd5	0.846154	12.7682	0.142887	0.167666	3.3968	3.7589	89.359
35	C	cd5	0.8439	9.76787	0.106576	0.155933	2.48518	3.93045	91.652
37	C	cd5	0.841646	6.80522	0.0784975	0.141597	1.73537	3.92148	86.6935
39	C	cd5	0.839391	4.6691	0.0625301	0.146402	1.59477	2.92776	74.6697
41	C	cd5	0.837701	2.55241	0.0465864	0.105238	1.04473	2.44314	54.7888
43	C	cd5	0.83601	0.938758	0.026893	0.120146	0.689367	1.36177	34.9071
47	C	cd5	0.835165	1.032	0.0292947	0.0901195	0.683222	1.51048	35.2281
49	C	cd5	0.83601	0.145691	0.0143917	0.0780764	0.372508	0.391108	10.1232
51	C	cd5	0.832629	0.784506	0.018612	0.0791623	0.514269	1.52548	42.1505
53	C	cd5	0.833474	2.13706	0.00967683	0.0677197	0.26557	8.04707	220.843
55	C	cd5	0.832629	0.535561	0.0175983	0.0603561	0.484377	1.10567	30.4326
1	C	cd6	1	9.80673	0.160945	0.190803	4.29752	2.28195	60.9321
2	C	cd6	0.991781	11.7497	0.175467	0.187229	4.60825	2.54972	66.9627
5	C	cd6	0.976908	9.94561	0.174028	0.191395	3.71346	2.67826	57.1495
7	C	cd6	0.968297	8.8079	0.171249	0.177446	3.52973	2.49535	51.4331
9	C	cd6	0.959687	12.7453	0.201029	0.224286	4.5978	2.77205	63.4003
11	C	cd6	0.951859	8.57988	0.180089	0.164352	4.16397	2.06051	47.6424
13	C	cd6	0.942466	8.23186	0.169842	0.161414	3.13927	2.62222	48.4678
15	C	cd6	0.933072	7.7048	0.154363	0.191466	2.87329	2.68153	49.9137
17	C	cd6	0.922896	7.1089	0.155977	0.18762	3.57243	1.98993	45.5766
19	C	cd6	0.914286	10.3958	0.181689	0.186914	4.30836	2.41294	57.2178
21	C	cd6	0.90411	6.31026	0.116756	0.161358	3.26689	1.93158	54.0467
23	C	cd6	0.894716	11.8767	0.174315	0.195121	3.9621	2.99758	68.1335
25	C	cd6	0.887671	7.8166	0.16693	0.177673	4.43503	1.76247	46.8256
27	C	cd6	0.881409	6.90285	0.139823	0.186961	3.20351	2.15478	49.3684
29	C	cd6	0.875538	8.05984	0.180602	0.148893	4.2425	1.89979	44.6276
31	C	cd6	0.869667	4.9251	0.171926	0.119196	2.7622	1.78304	28.6466
33	C	cd6	0.864188	8.63588	0.16323	0.162316	3.7312	2.31451	52.9063
36	C	cd6	0.853229	8.43676	0.19237	0.178361	4.20684	2.00549	43.8569
38	C	cd6	0.846184	9.08881	0.199797	0.179798	4.42695	2.05307	45.4902
40	C	cd6	0.841487	7.69166	0.138276	0.1611	2.92401	2.63052	55.6256
42	C	cd6	0.833659	9.11914	0.133876	0.151845	2.82584	3.22706	68.1165
46	C	cd6	0.821135	11.7037	0.109858	0.186973	2.76238	4.23684	106.535
48	C	cd6	0.818004	5.78137	0.0748368	0.127259	1.66006	3.48262	77.2531
50	C	cd6	0.813307	5.89352	0.0577739	0.145914	1.62062	3.63659	102.01
52	C	cd6	0.811742	3.84752	0.0303024	0.112074	0.863868	4.45383	126.971
54	C	cd6	0.810176	2.44393	0.0379559	0.0898887	0.883985	2.76468	64.3889
56	C	cd6	0.807828	0.85847	0.0347062	0.0746393	0.670139	1.28103	24.7354
58	C	cd6	0.806262	1.45192	0.0169522	0.083747	0.408865	3.5511	85.648
60	C	cd6	0.805479	0.762688	0.019744	0.0899684	0.571999	1.33337	38.6289

## Sheet: Exp2_water_potential
Treatment	Fraction_PC	Water_potential (MPa)			Treatment	Water_potential	Cond
A	0.7536	-5.8			A	-0.8	0.255515
A	0.7582	-3.9			C	-0.8	0.361837
A	0.7876	-6.3			A	-0.9	0.248674
A	0.7928	-5			C	-0.9	0.191079
A	0.7973	-1.5			C	-1	0.171926
A	0.7997	-3			A	-1	0.213367
A	0.8043	-6.185			C	-1.1	0.0784975
A	0.8068	-7.5			A	-1.1	0.261096
A	0.8068	-6.4			A	-1.1	0.438757
C	0.8085	-6.3			C	-1.1	0.437998
C	0.811	-7.7			A	-1.2	0.323179
A	0.8118	-2			A	-1.2	0.390764
A	0.812	-6.6			A	-1.2	0.226695
C	0.8122	-5.96			C	-1.2	0.22102
C	0.8143	-5.8			C	-1.3	0.199797
A	0.8144	-8			A	-1.3	0.15995
C	0.8169	-4			C	-1.3	0.201951
A	0.8172	-3.2			C	-1.3	0.247599
C	0.8176	-4.3			C	-1.4	0.22067
A	0.81815	-4.6			A	-1.4	0.283111
C	0.82	-6			C	-1.4	0.260613
A	0.8229	-2			A	-1.5	0.0733868
A	0.8235	-3.2			A	-1.5	0.28273
C	0.8268	-3.6			C	-1.6	0.225605
C	0.8326	-7.1			C	-1.7	0.179252
C	0.8365	-7			C	-1.7	0.216303
C	0.8384	-5			A	-1.8	0.0892321
A	0.8386	-3.3			A	-2	0.0861959
C	0.8389	-5.2			A	-2	0.10856
C	0.8389	-2.4			A	-2	0.15995
C	0.839	-7.7			C	-2.3	0.0778871
A	0.8398	-1.5			C	-2.4	0.13483
C	0.8414	-5.9			A	-3	0.0920897
C	0.8416	-1.1			A	-3.2	0.0673958
C	0.842	-3.9			A	-3.2	0.0571359
C	0.8428	-7			A	-3.3	0.0896087
C	0.8448	-3.3			C	-3.3	0.0350998
C	0.8485	-2.3			C	-3.6	0.065125
C	0.8492	-4.6			A	-3.9	0.0291116
C	0.8495	-1.7			C	-3.9	0.0313814
C	0.8532	-1.3			C	-4	0.0379559
A	0.8567	-1.1			C	-4.3	0.0367328
A	0.86	-1.8			A	-4.6	0.0301985
A	0.8683	-0.9			C	-4.6	0.0390785
C	0.8769	-1			A	-5	0.0311638
A	0.8867	-1			C	-5	0.0275319
A	0.8981	-0.8			C	-5.2	0.022239
A	0.9007	-1.3			A	-5.8	0.0162058
A	0.9068	-1.2			C	-5.8	0.0357414
C	0.912	-1.4			C	-5.9	0.012553
A	0.9139	-1.2			C	-5.96	0.019744
C	0.9153	-0.8			C	-6	0.025367
A	0.933	-2			A	-6.185	0.0246675
A	0.9352	-1.2			A	-6.3	0.0163015
C	0.9353	-1.3			C	-6.3	0.0162906
A	0.9424	-1.4			A	-6.4	0.0363824
C	0.9464	-0.9			A	-6.6	0.0158126
A	0.9517	-1.1			C	-7	0.0230511
C	0.9548	-1.1			C	-7	0.0563523
C	0.96125	-1.6			C	-7.1	0.0175983
C	0.9622	-1.2			A	-7.5	0.0244831
C	0.9654	-1.3			C	-7.7	0.0884733
C	0.9687	-1.7			C	-7.7	0.0160105
C	0.9707	-1.4			A	-8	0.0380259

## Sheet: Field_colonization
Treatment	harvest	both	AMF	Arb	Ves	Sclerotia	Septate
Myco	spring	MS	65.4545	38.1818	0	3.63636	13.6364
Myco	spring	MS	54.7826	20.8696	20	10.4348	35.6522
Myco	spring	MS	22.9167	16.6667	1.04167	4.16667	38.5417
Myco	spring	MS	69.4737	8.42105	13.6842	4.21053	64.2105
Myco	spring	MS	45.3608	8.24742	9.27835	27.8351	51.5464
Myco	spring	MS	40.5405	5.40541	6.30631	13.5135	45.045
Myco	spring	MS	41.0959	22.6027	17.1233	15.7534	56.1644
Myco	spring	MS	33.8028	15.493	0	35.2113	46.4789
Control	spring	CS	29.5652	13.913	2.6087	1.73913	28.6957
Control	spring	CS	36.5385	19.2308	6.73077	10.5769	17.3077
Control	spring	CS	18.3544	6.32911	1.26582	1.89873	16.4557
Control	spring	CS	49.5327	7.47664	28.972	28.0374	60.7477
Control	spring	CS	10.8108	0.900901	3.6036	2.7027	49.5495
Control	spring	CS	29.8077	4.80769	16.3462	13.4615	33.6538
Control	spring	CS	12.2642	0	5.66038	6.60377	28.3019
Control	spring	CS	12.1212	5.05051	0	6.06061	25.2525
Control	fall	CF	3.22581	0	0	2.15054	31.1828
Control	fall	CF	19.0909	8.18182	0	2.72727	32.7273
Control	fall	CF	5.88235	2.52101	0	7.56303	21.0084
Control	fall	CF	5.33333	1.33333	1.33333	2.66667	38.6667
Myco	fall	MF	31.5315	0.900901	3.6036	21.6216	47.7477
Myco	fall	MF	49.4624	8.60215	34.4086	3.22581	37.6344
Myco	fall	MF	29.9065	5.60748	9.34579	9.34579	42.9907
Myco	fall	MF	24.2991	21.4953	0	2.80374	20.5607

## Sheet: Field_survival
plant	treatment	Day	time	event	flowers-7-20	flowers-7-21
1	myco	2020-06-26	244	1
2	myco	2021-10-30	735	0	1
3	control	2021-10-30	735	0
4	control	2020-06-12	230	0
5	control	2021-10-30	735	0	1
6	control	2021-10-30	735	0
7	control	2021-10-30	735	0	1
8	myco	2021-10-30	735	0
9	myco	2021-10-30	735	0	1
10	control	2021-10-30	735	0
11	control	2021-10-30	735	0	1
12	myco	2021-10-30	735	0
13	myco	2021-10-30	735	0	1
14	myco	2020-06-12	230	0
15	control	2021-10-30	735	0	1	1
16	myco	2021-10-30	735	0
17	myco	2021-10-30	735	0	1	1
18	control	2021-10-30	735	0
19	control	2021-10-30	735	0
20	control	2021-10-30	735	0
21	control	2021-07-27	640	1
22	control	2021-10-30	735	0
23	myco	2021-10-30	735	0
24	control	2021-10-30	735	0	1
25	myco	2021-10-30	735	0
26	control	2021-10-30	735	0
27	myco	2021-10-30	735	0
28	myco	2021-10-30	735	0
29	control	2021-10-30	735	0	1
30	myco	2021-10-30	735	0
31	myco	2021-10-30	735	0		1
32	control	2021-10-30	735	0
33	myco	2020-06-12	230	0
34	control	2020-06-12	230	0
35	myco	2020-11-05	376	0	1	1
36	control	2020-11-05	376	0	1
37	control	2021-10-30	735	0		1
38	control	2021-10-30	735	0
39	control	2021-10-30	735	0
40	myco	2021-10-30	735	0		1
41	myco	2021-10-30	735	0
42	myco	2021-10-30	735	0	1
43	control	2021-10-30	735	0
44	myco	2021-10-30	735	0
45	control	2020-06-12	230	0
46	control	2020-11-05	376	0
47	control	2021-10-30	735	0	1	1
48	control	2021-10-30	735	0
49	control	2021-10-30	735	0	1
50	control	2021-10-30	735	0		1
51	myco	2021-10-30	735	0	1	1
52	myco	2021-10-30	735	0	1
53	myco	2020-06-12	230	0
54	myco	2021-10-30	735	0		1
55	myco	2021-10-30	735	0	1	1
56	control	2021-10-30	735	0	1	1
57	control	2021-10-30	735	0		1
58	myco	2021-10-30	735	0	1	1
59	control	2021-10-30	735	0	1	1
60	myco	2021-10-30	735	0		1
61	myco	2021-10-30	735	0	1	1
62	myco	2021-10-30	735	0	1
63	control	2020-03-07	133	1
64	myco	2021-10-30	735	0	1	1
65	myco	2021-10-30	735	0		1
66	control	2021-10-30	735	0
67	control	2020-06-12	230	0
68	myco	2021-10-30	735	0	1	1
69	myco	2020-11-05	376	0	1
70	control	2021-10-30	735	0		1
71	myco	2020-03-07	133	1
72	control	2021-10-30	735	0	1
73	myco	2021-10-30	735	1	1	1
74	myco	2021-07-27	640	1
75	control	2021-10-30	735	0	1
76	control	2021-10-30	735	0	1	1
77	control	2021-10-30	735	0		1
78	control	2020-11-05	376	0	1
79	control	2021-10-30	735	0
80	control	2021-03-27	518	1
81	control	2021-10-30	735	0		1
82	control	2020-03-07	133	1
83	myco	2021-10-30	735	0
84	myco	2021-10-30	735	0		1
85	control	2021-10-30	735	0
86	control	2021-10-30	735	0		1
87	myco	2021-10-30	735	0	1
88	control	2021-10-30	735	0
89	myco	2021-10-30	735	0		1
90	control	2020-06-26	244	1
91	myco	2020-06-12	230	0
92	control	2021-10-30	735	0	1	1
93	myco	2020-11-05	376	0	1
94	myco	2021-10-30	735	0	1	1
95	control	2020-11-05	376	0	1
96	control	2021-10-30	735	0
97	myco	2021-10-30	735	0
98	myco	2021-10-30	735	0	1	1
99	control	2021-10-30	735	0	1	1
100	myco	2020-03-26	152	1
101	myco	2021-10-30	735	0	1	1
102	control	2021-10-30	735	0	1	1
103	control	2021-10-30	735	0
104	control	2021-10-30	735	0	1
105	myco	2021-10-30	735	0		1
106	control	2021-10-30	735	0	1
107	control	2021-10-30	735	0		1
108	control	2021-10-30	735	0
109	control	2021-10-30	735	0
110	control	2020-06-12	230	0
111	myco	2020-11-05	376	0
112	control	2021-10-30	735	0
113	control	2021-10-30	735	0	1	1
114	control	2021-10-30	735	0
115	myco	2021-10-30	735	0	1	1
116	myco	2021-10-30	735	0		1
117	myco	2020-06-12	230	0
118	control	2021-10-30	735	0		1
119	myco	2021-10-30	735	0		1
120	myco	2021-10-30	735	0		1
121	myco	2021-10-30	735	0	1	1
122	control	2021-10-30	735	0		1
123	control	2020-03-26	152	1
124	myco	2021-10-30	735	0	1
125	control	2020-06-12	230	0
126	myco	2021-10-30	735	0	1
127	myco	2020-06-12	230	0
128	control	2021-10-30	735	0	1	1
129	myco	2021-10-30	735	0	1	1
130	control	2021-10-30	735	0		1
131	myco	2021-10-30	735	0		1
132	control	2021-10-30	735	0	1	1
133	control	2020-05-01	188	1
134	myco	2021-10-30	735	0		1
135	myco	2021-10-30	735	0
136	control	2021-10-30	735	0
137	control	2021-10-30	735	0	1
138	control	2021-10-30	735	0		1
139	control	2021-10-30	735	0
140	myco	2021-10-30	735	0	1
141	control	2020-06-26	244	1
142	myco	2021-10-30	735	0		1
143	myco	2021-10-30	735	0
144	myco	2021-10-30	735	0		1
145	myco	2021-10-30	735	0	1
146	myco	2021-10-30	735	0
147	control	2021-10-30	735	0	1
148	myco	2021-10-30	735	0	1	1
149	myco	2021-10-30	735	0	1	1
150	control	2021-10-30	735	0
151	myco	2021-10-30	735	0	1	1
152	control	2021-10-30	735	0
153	myco	2021-10-30	735	0	1	1
154	myco	2021-10-30	735	0		1
155	myco	2021-10-30	735	0
156	myco	2021-10-30	735	0	1
157	myco	2021-10-30	735	0		1
158	myco	2021-10-30	735	0
159	control	2021-10-30	735	0	1	1
160	control	2021-10-30	735	0	1	1
161	myco	2020-06-26	244	1
162	control	2021-10-30	735	0		1
163	control	2021-10-30	735	0
164	control	2021-10-30	735	0	1	1
165	myco	2021-10-30	735	0		1
166	control	2021-10-30	735	0
167	control	2021-10-30	735	0
168	control	2021-10-30	735	0
169	myco	2021-10-30	735	0		1
170	control	2021-10-30	735	0
171	control	2021-10-30	735	0	1
172	control	2021-10-30	735	0
173	control	2021-10-30	735	0		1
174	control	2020-11-05	376	0	1
175	myco	2021-10-30	735	0	1	1
176	myco	2021-10-30	735	0	1	1
177	myco	2021-10-30	735	0	1	1
178	control	2021-10-30	735	0	1
179	control	2021-10-30	735	0	1
180	control	2021-10-30	735	0
181	myco	2021-10-30	735	0
182	control	2021-03-27	518	1
183	myco	2021-10-30	735	0
184	myco	2021-10-30	735	0	1
185	myco	2021-10-30	735	0
186	myco	2021-10-30	735	0	1
187	control	2021-10-30	735	0	1
188	myco	2021-10-30	735	0	1	1
189	control	2021-10-30	735	0
190	control	2021-10-30	735	1
191	control	2020-06-12	230	0
192	myco	2021-10-30	735	0	1	1
193	myco	2020-06-12	230	0
194	control	2021-10-30	735	0	1
195	control	2021-10-30	735	0	1	1
196	myco	2021-10-30	735	0	1	1
197	control	2021-10-30	735	0	1	1
198	control	2020-06-12	230	0
199	myco	2021-10-30	735	0		1
200	myco	2021-10-30	735	0	1	1
201	control	2021-10-30	735	0	1
202	control	2021-10-30	735	0
203	myco	2021-10-30	735	0	1	1
204	myco	2021-10-30	735	0		1
205	control	2021-10-30	735	0		1
206	myco	2020-06-12	230	0
207	myco	2021-10-30	735	0
208	myco	2021-10-30	735	0	1	1
209	control	2021-10-30	735	0	1	1
210	myco	2021-10-30	735	0		1
211	control	2021-10-30	735	0		1
212	myco	2021-10-30	735	0		1
213	control	2021-10-30	735	0	1	1
214	myco	2021-10-30	735	0		1
215	control	2021-10-30	735	0	1	1
216	myco	2021-10-30	735	0		1
217	myco	2021-10-30	735	0	1	1
218	myco	2021-10-30	735	0		1
219	myco	2021-10-30	735	0
220	myco	2021-10-30	735	0	1	1
221	control	2021-10-30	735	0	1	1
222	myco	2021-10-30	735	0	1
223	control	2021-10-30	735	0
224	control	2021-10-30	735	0		1
225	control	2021-10-30	735	0	1	1
226	myco	2021-10-30	735	0		1
227	control	2021-10-30	735	0
228	control	2021-10-30	735	0
229	control	2021-10-30	735	0		1
230	myco	2021-10-30	735	0		1
231	control	2021-10-30	735	0	1
232	control	2021-10-30	735	0	1	1
233	control	2021-10-30	735	0
234	control	2021-10-30	735	0		1
235	myco	2020-06-12	230	0
236	control	2021-10-30	735	0		1
237	control	2021-10-30	735	0		1
238	control	2021-10-30	735	0		1
239	myco	2021-10-30	735	0
240	control	2021-10-30	735	0		1
241	control	2021-10-30	735	0	1	1
242	myco	2021-10-30	735	0		1
243	myco	2021-10-30	735	0	1	1
244	myco	2021-10-30	735	0	1	1
245	myco	2021-10-30	735	0	1	1
246	myco	2021-10-30	735	0		1
247	myco	2021-10-30	735	0	1
248	myco	2021-10-30	735	0		1
249	myco	2021-10-30	735	0	1	1
250	myco	2021-10-30	735	0	1	1
251	control	2021-10-30	735	0	1
252	control	2021-10-30	735	0		1
253	myco	2021-10-30	735	0		1
254	myco	2021-10-30	735	0		1
255	control	2021-10-30	735	0	1	1
256	myco	2021-10-30	735	0		1
257	myco	2021-10-30	735	0	1
258	myco	2021-10-30	735	0
259	myco	2021-10-30	735	0	1
260	myco	2021-10-30	735	0	1
261	control	2021-10-30	735	0	1	1
262	control	2021-10-30	735	0
263	control	2021-10-30	735	0	1	1
264	myco	2021-10-30	735	0	1	1
265	myco	2021-10-30	735	0	1	1
266	control	2021-10-30	735	0	1	1
267	myco	2021-10-30	735	0	1	1
268	myco	2021-10-30	735	0	1	1
269	myco	2021-10-30	735	0		1
270	control	2021-10-30	735	0
271	myco	2021-10-30	735	0		1
272	control	2021-10-30	735	0	1	1
273	myco	2021-10-30	735	0
274	myco	2021-10-30	735	0	1	1
275	myco	2021-10-30	735	0		1
276	myco	2021-03-27	518	1	1
277	control	2021-10-30	735	0	1	1
278	control	2021-10-30	735	0		1
279	control	2021-10-30	735	0
280	control	2021-10-30	735	0	1	1
281	myco	2021-10-30	735	0		1
282	control	2021-10-30	735	0		1
283	myco	2021-10-30	735	0	1
284	control	2021-10-30	735	0		1
285	control	2021-10-30	735	0		1
286	control	2021-10-30	735	0		1
287	myco	2021-10-30	735	0	1	1
288	myco	2021-10-30	735	0	1	1
289	control	2021-10-30	735	0
290	myco	2020-06-12	230	0
291	control	2020-06-12	230	0
292	control	2020-06-12	230	0
293	myco	2021-10-30	735	0	1
294	myco	2021-10-30	735	0	1	1
295	myco	2021-10-30	735	0		1
296	myco	2021-10-30	735	0
297	myco	2021-10-30	735	0	1
298	control	2021-10-30	735	0	1	1
299	myco	2021-10-30	735	0
300	control	2021-07-27	640	1
